# Supplementary material for: Beauvericin inhibits melanogenesis by regulating cAMP/PKA/CREB and LXR-α/p38 MAPK–mediated pathways
Source: PubMed Central journal article supplement (PMC6175938; doi:10.1038/s41598-018-33352-8), 2018-10-08
Supplement: 41598_2018_33352_MOESM1_ESM.pdf [file 41598_2018_33352_MOESM1_ESM.pdf]

# Supplementary Information

## Beauvericin inhibits melanogenesis by regulating cAMP/PKA/CREB and LXR- $\alpha$ /p38

### MAPK-mediated pathways

Seung Eun Lee<sup>a,1</sup>, See-Hyoung Park<sup>d,1</sup>, Sae Woong Oh<sup>a</sup>, Ju Ah Yoo<sup>a</sup>, Kitae Kwon<sup>a</sup>, Se Jung Park<sup>a</sup>, Jangsoon Kim<sup>a</sup>, Hak Sung Lee<sup>e</sup>, Jae Youl Cho<sup>b,c,\*</sup>, Jongsung Lee<sup>a,c,\*</sup>

<sup>a</sup>*Molecular Dermatology Laboratory, Department of Integrative Biotechnology & Biocosmetics Research Center, College of Biotechnology and Bioengineering, Sungkyunkwan University, Suwon City, 16419 Gyunggi Do, Republic of Korea*

<sup>b</sup>*Molecular Immunology Laboratory, Department of Integrative Biotechnology, College of Biotechnology and Bioengineering, Sungkyunkwan University, Suwon City, 16419 Gyunggi Do, Republic of Korea*

<sup>c</sup>*Biocosmetics Research Center, College of Biotechnology and Bioengineering, Sungkyunkwan University, Suwon City, 16419 Gyunggi Do, Republic of Korea*

<sup>d</sup>*Department of Bio and Chemical Engineering, Hongik University, 30016 Sejong City, Republic of Korea*

<sup>e</sup>*Food Science R&D Center, Kolmar BNH Co., Ltd., 30003 Sejong City, Republic of Korea*

Raw Data (Fig. 2)

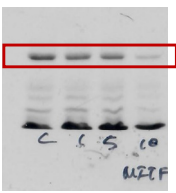

MITF

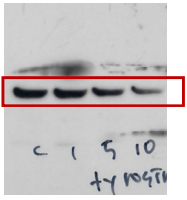

Tyrosinase

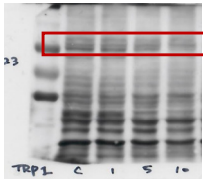

TRP1

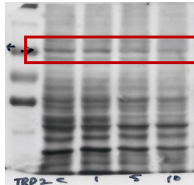

TRP2

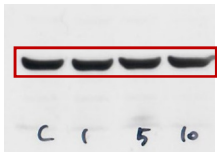

beta-actin

Raw Data  
(Fig. 3)

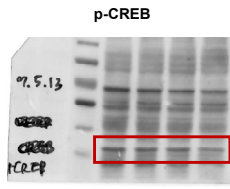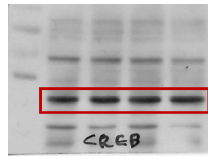

CREB

Raw Data  
(Fig. 4)

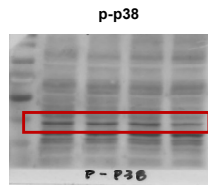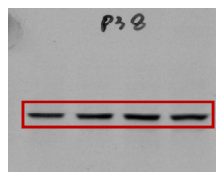

p38

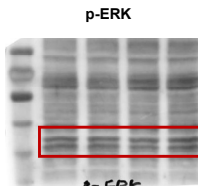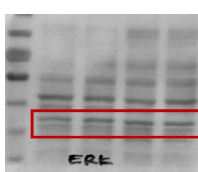

ERK

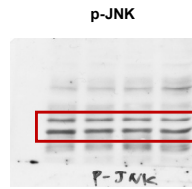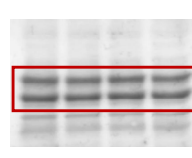

JNK

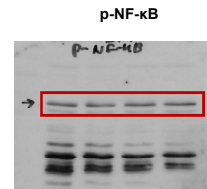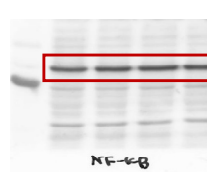

NF-kB

Raw Data  
(Fig. 5)

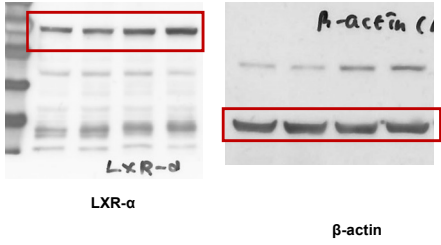

Raw Data  
(Fig. 6)

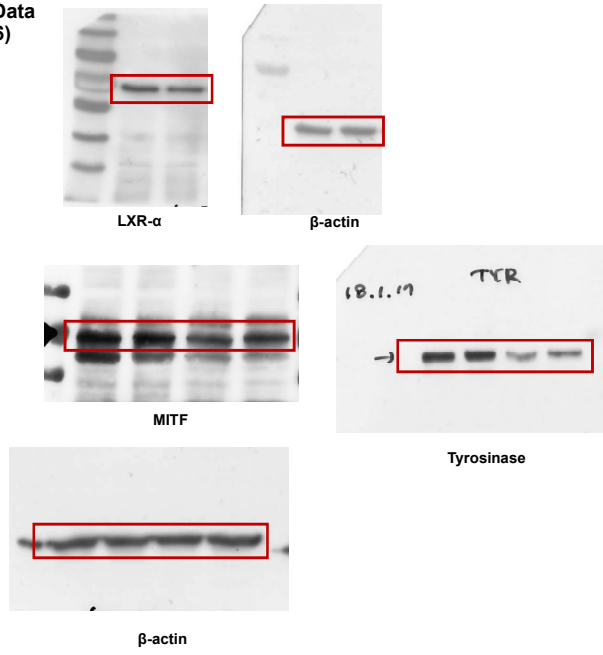

Raw Data  
(Fig. 7)

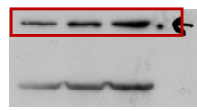

LXR-α

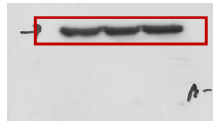

β-actin

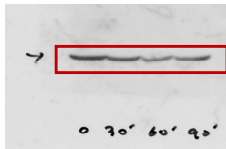

p-p38

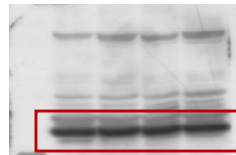

p38

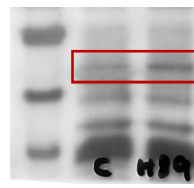

LXR-α

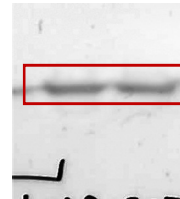

β-actin

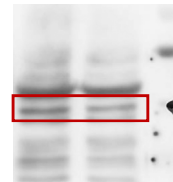

p-p38

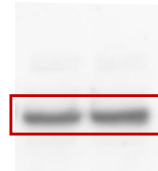

p38

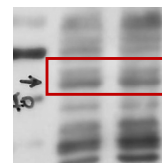

p-CREB

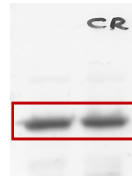

CREB
